# Supplementary material
Source: Springer Nature journal article supplement (https://www.springermedizin.de/resource/supplementary/12990_2009_234_MOESM2_ESM.pdf/9612850)

## D. Spontaneous LFP

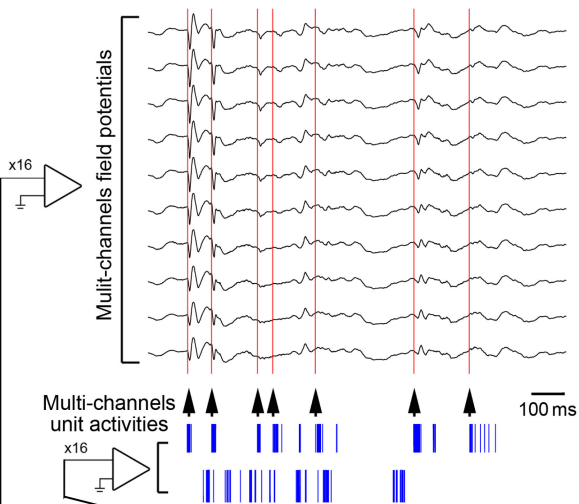

## E. Spike averaged CSD

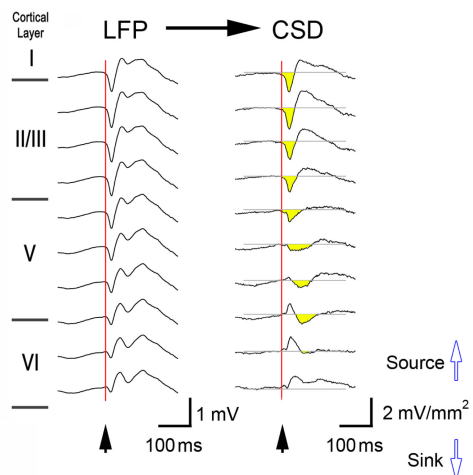

## C. ACC recording/lesion sites

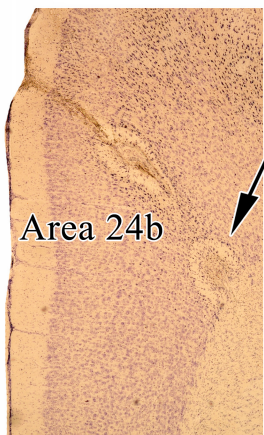

## B. Mediodorsal thalamic recording/lesion sites

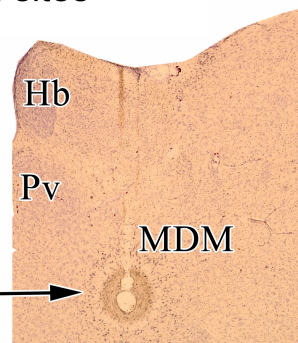

## A. Foot stimulation site \*

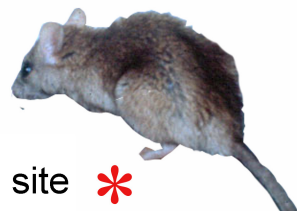

Supplement: MOESM2 [file 9612850]
